# Supplementary material for: Responses of Early Distribution and Developmental Traits of Male and Female Trees to Stand Density in Fraxinus mandshurica Rupr. Plantation
Source: MDPI journal article supplement (doi:10.3390/f13030472), 2022-03-18
Supplement: s1 [file s1]

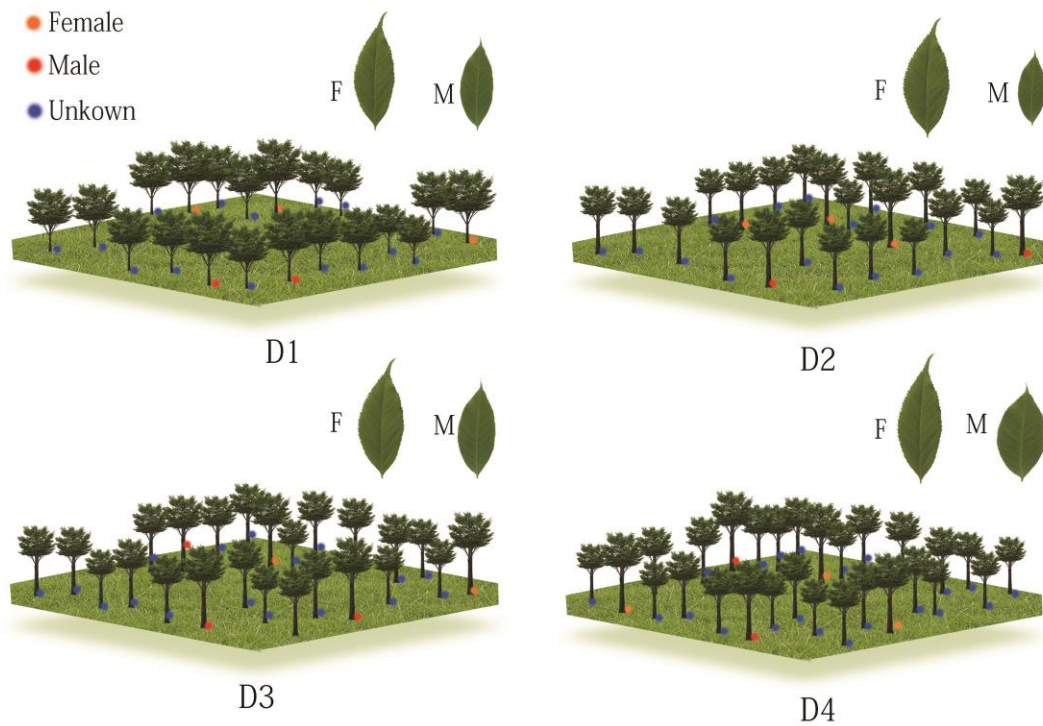

**Supplementary Figure S1.** Schematic diagram of the growth of male and female plants in each density. Leaves in figure for 'F' shows female leaf, 'M' shows male leaf. The D1 plant spacing is 1.5 m  $\times$  3 m; D2 plant spacing is 2 m  $\times$  2 m; D3 plant spacing is 1.5 m  $\times$  1.5 m; D4 plant spacing is 1 m  $\times$  1 m.
